# Supplementary material
Source: Springer Nature journal article supplement (https://www.springermedizin.de/resource/supplementary/12889_2008_1193_MOESM3_ESM.pdf/9502658)

| SWITCH POINTS                                                                                                                                                                                                       |              | SWITCH POINT |
|---------------------------------------------------------------------------------------------------------------------------------------------------------------------------------------------------------------------|--------------|--------------|--------------|--------------|--------------|--------------|--------------|--------------|--------------|--------------|
|  <p><b>SWITCH POINT</b><br/>           Description of the first switch point, including a list of items and their quantities.</p>  | SWITCH POINT |
|                                                                                                                                                                                                                     | SWITCH POINT |
|  <p><b>SWITCH POINT</b><br/>           Description of the second switch point, including a list of items and their quantities.</p> | SWITCH POINT |
|                                                                                                                                                                                                                     | SWITCH POINT |
|  <p><b>SWITCH POINT</b><br/>           Description of the third switch point, including a list of items and their quantities.</p>  | SWITCH POINT |
|                                                                                                                                                                                                                     | SWITCH POINT |

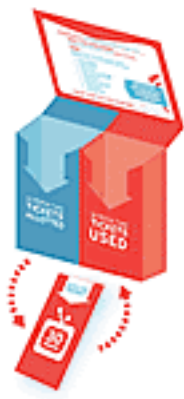

Supplement: MOESM3 [file 9502658]
